# Supplementary material
Source: PubMed Central journal article supplement (PMC2836724)
Supplement: NIHMS169859-supplement-1.pdf [file NIHMS169859-supplement-1.pdf]

## Supplementary Information Titles

|                                 |
|---------------------------------|
| <b>Journal:</b> Nature Medicine |
|---------------------------------|

|                               |                                                                                    |
|-------------------------------|------------------------------------------------------------------------------------|
| <b>Article Title:</b>         | Inhibition of gut derived serotonin synthesis: a potential bone anabolic treatment |
| <b>Corresponding Authors:</b> | Gerard Karsenty, Patricia Ducy                                                     |
|                               |                                                                                    |

| <b><u>Supplementary Item &amp; Number</u></b> | <b><u>Title or Caption</u></b>                                                                                                                             |
|-----------------------------------------------|------------------------------------------------------------------------------------------------------------------------------------------------------------|
| Supplementary Fig. 1                          | <b>Structural analyses of LP533401 used in this study.</b>                                                                                                 |
| Supplementary Fig. 2                          | <b>Serotonin measurement in brain and serum in mice.</b>                                                                                                   |
| Supplementary Fig. 3                          | <b>Assessment of ovariectomy-induced and LP533401-induced changes in sham or ovariectomized mice.</b>                                                      |
| Supplementary Fig. 4                          | <b>Assessment of bone mass, length and width, humoral and gastrointestinal parameters in mice.</b>                                                         |
| Supplementary Fig. 5                          | <b>Assessment of ovariectomy-induced and LP533401-induced changes in body weight, humoral and biomechanical parameters in sham or ovariectomized rats.</b> |
| Supplementary Fig. 6                          | <b>Assessment of endocortical and periosteal parameters in sham and ovariectomized rats treated with vehicle, LP533401 and PTH.</b>                        |
| Supplementary Fig. 7                          | <b>Bioinformatic analysis of Tph1 interaction with LP533401 and HBI.</b>                                                                                   |
