# Supplementary material
Source: PubMed Central journal article supplement (PMC2836724)
Supplement: NIHMS169859-supplement-2.pdf [file NIHMS169859-supplement-2.pdf]

# Supplementary Fig. 1

a

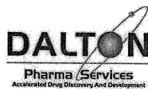

## Analytical Data Sheet

Name: LP-533401 Hydrochloride

Structure:

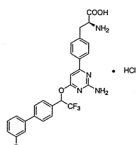

Lot No.: VM-09-49C  
 Quantity: 11.0 g  
 Appearance: Off-white powder  
 M. F.:  $C_{27}H_{23}ClF_4N_4O_3$   
 M. W.: 526.48 (Free Base)  
 $^1H$  NMR: Conforms to structure  
 HPLC purity: 98.5%  
 LCMS: Conforms to structure. m/z 527.1 [M+H]<sup>+</sup>  
 Pd Analysis: 891 ppm  
 OR: -11.75° (DMSO, c = 0.5)

Dalton Pharma Services Certifies that the above data is true and correct

Martyn A Brown PhD AQPIC.  
 Chemistry Services Manager

07/16/09  
 Date

b

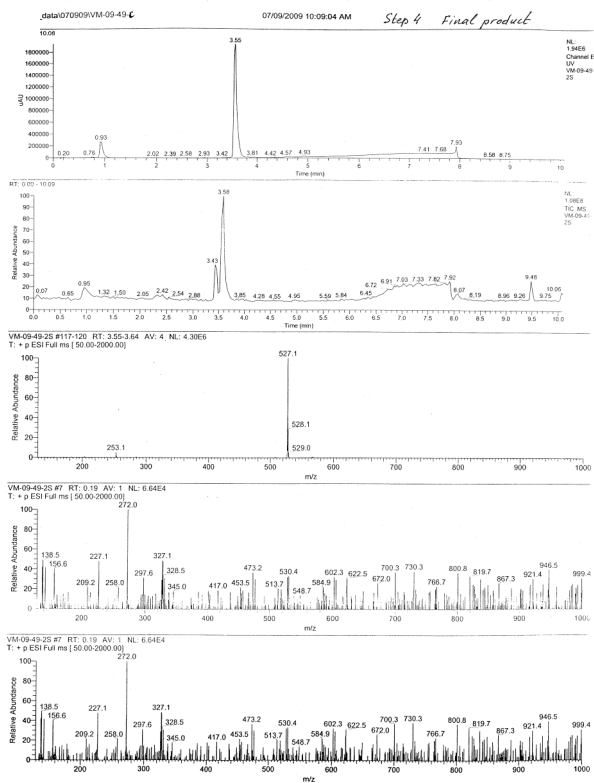

c

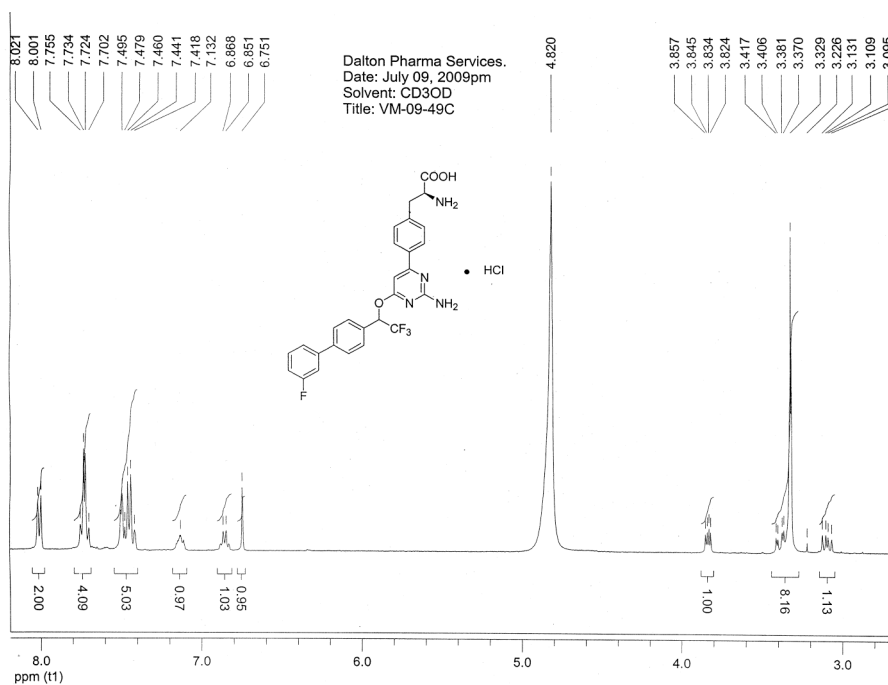

d

Project Name HPLCLAB2  
 User Name System  
 Software Version 3.05.01

Report Method Name BI\_Lab2 Report  
 Current Date 7/13/09

**Sample Information**

SampleName VM-09-49C  
 Vial 1  
 Injection 1  
 Injection Volume 10.00 ul  
 Channel 2487Channel 1  
 RunTime 16.07 Minutes

Sample Type Unknown  
 Date Acquired 7/13/09 10:20:22 AM  
 Acq Method Set BI\_Lab2 Method Set  
 Processing Method BI\_Lab2 processing  
 Date Processed 7/13/09 12:24:28 PM  
 Date Processed 7/13/09 12:25:00 PM

**Instrument Method: BI\_lab2**

Stored: 4/21/09 11:32:08 AM

Comments  
 Modified User System  
 Locked No  
 Method Id 26928  
 Method Version 16  
 Edit User

**W600 Gradient Table**

| Sl | Time  | Flow | %A   | %B    | %C  | %D  | Curve |
|----|-------|------|------|-------|-----|-----|-------|
| 1  | 3.00  | 95.0 | 5.0  | 0.0   | 0.0 |     | 6     |
| 2  | 0.50  | 3.00 | 95.0 | 5.0   | 0.0 | 0.0 | 6     |
| 3  | 10.50 | 3.00 | 0.0  | 100.0 | 0.0 | 0.0 | 6     |
| 4  | 12.50 | 3.00 | 95.0 | 5.0   | 0.0 | 0.0 | 6     |
| 5  | 16.00 | 3.00 | 95.0 | 5.0   | 0.0 | 0.0 | 6     |

Mobile Phase: A: 0.1% TFA/Water, B: 0.1% TFA/ACN

Wavelength: Channel 1 = 254 nm, Channel 2 = 220 nm

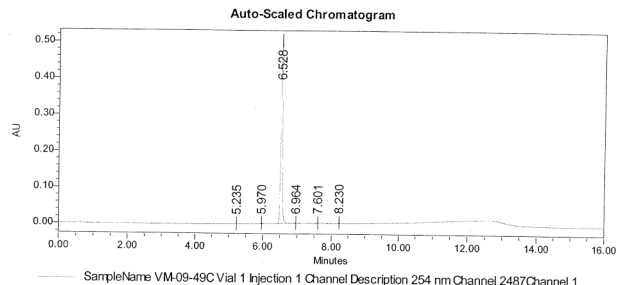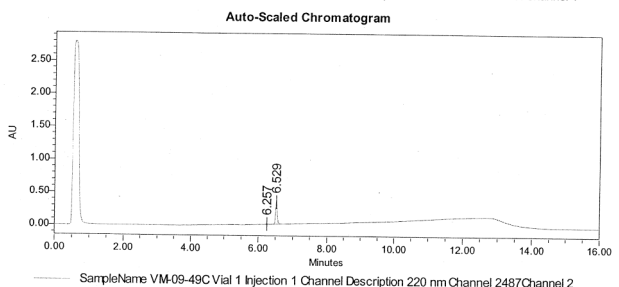

**Peak Results**

| Sl | RT    | Area    | % Area | Height | Channel       | Channel Description |
|----|-------|---------|--------|--------|---------------|---------------------|
| 1  | 5.235 | 1364    | 0.08   | 476    | 2487Channel 1 | 254 nm              |
| 2  | 5.970 | 5179    | 0.32   | 1783   | 2487Channel 1 | 254 nm              |
| 3  | 6.257 | 19513   | 1.68   | 6224   | 2487Channel 2 | 220 nm              |
| 4  | 6.528 | 1615371 | 98.50  | 481065 | 2487Channel 1 | 254 nm              |
| 5  | 6.529 | 1144295 | 98.32  | 325247 | 2487Channel 2 | 220 nm              |
| 6  | 6.964 | 4541    | 0.28   | 1146   | 2487Channel 1 | 254 nm              |
| 7  | 7.601 | 3502    | 0.21   | 1012   | 2487Channel 1 | 254 nm              |
| 8  | 8.230 | 10063   | 0.61   | 2103   | 2487Channel 1 | 254 nm              |

**Supplementary Fig. 1. Structural analyses of LP533401 used in this study. (a)** Analytical data sheet and compound structure. **(b)** LC/MS spectra **(c)** <sup>1</sup>H NMR spectra. Values are in ppm relative to tetramethylsilane. **(d)** Analytical HPLC. All analyses were performed by Dalton Pharma Services (Toronto, Canada).

## Supplementary Fig. 2

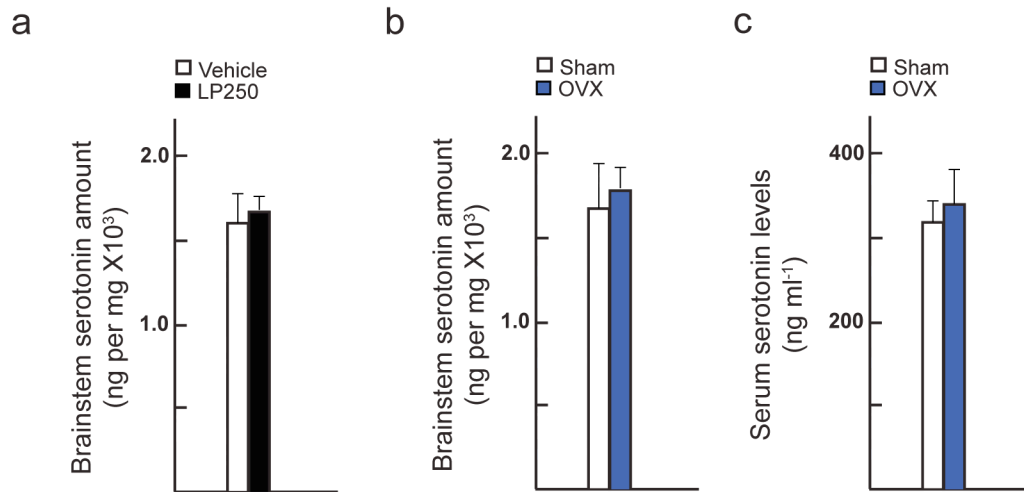

**Supplementary Fig. 2. Serotonin measurement in brain and serum in mice.** (a) HPLC analysis of serotonin content in the brain of wild-type mice that received vehicle or LP533401 (250 mg per kg body weight per day, orally) for 1 day. Brainstem serotonin content (b) and serum serotonin levels (c) in mice that were either Sham-operated or ovariectomized at 6 weeks and left untreated till 10 weeks of age.

### Supplementary Fig. 3

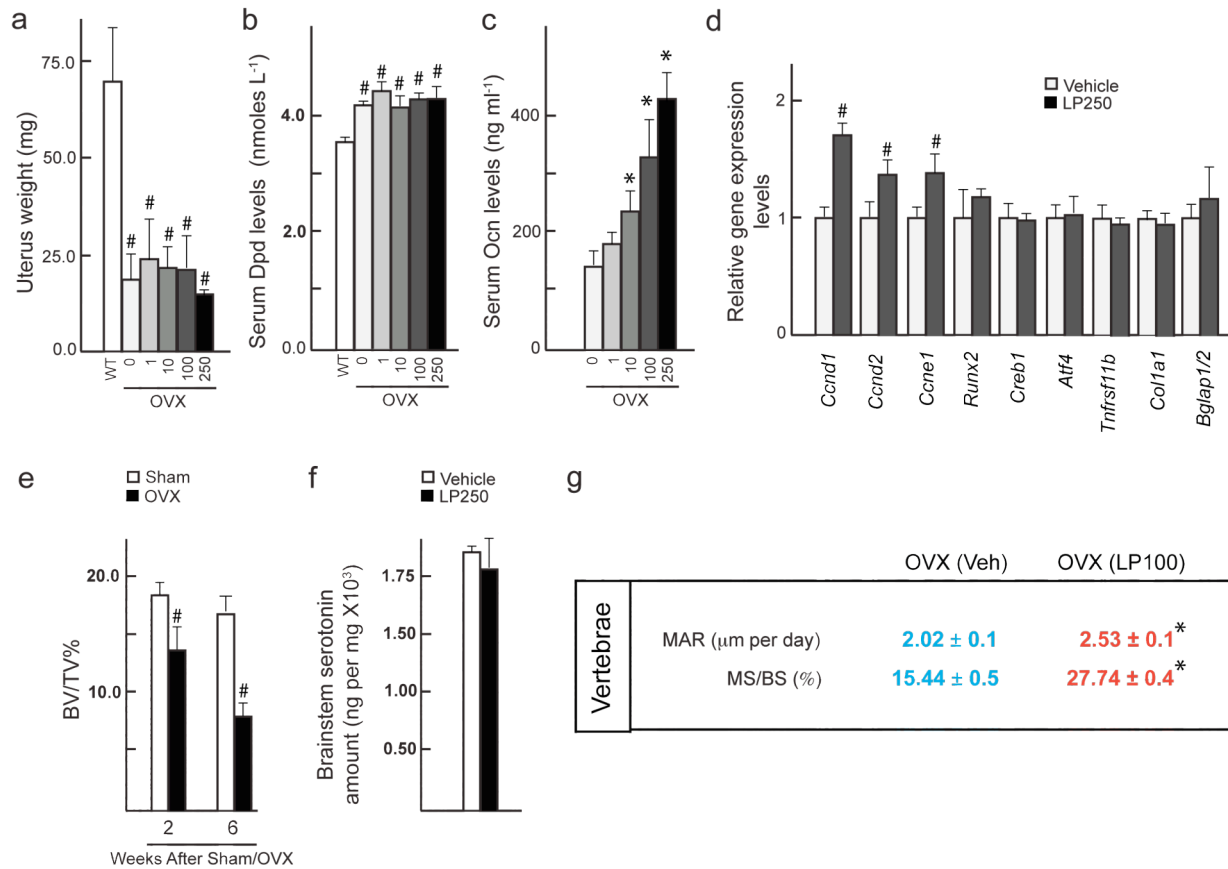

**Supplementary Fig. 3. Assessment of ovariectomy–induced and LP533401–induced changes in sham or ovariectomized mice. (a–d)** Uterus weight (a), serum Dpd (b) and serum osteocalcin levels (c) of sham–operated (sham) or ovariectomized wild–type mice that received different doses of LP533401 (0, 1, 10, 100 or 250 mg per kg body weight per day, orally) from day 1 to 28 post–ovariectomy. (d) Gene expression changes in the long bones assessed by real time PCR in long bones of wild–type mice that received either vehicle or LP533401 (250 mg per kg body weight per day). (e) Histomorphometric analysis of vertebrae of mice 2– and 6–weeks after sham or bilateral ovariectomy (OVX) to determine bone loss before the onset of treatment. (f) HPLC analysis of serotonin content in the brain of wild–type mice that received vehicle or LP533401 (250 mg per kg body weight per day, orally) treatment. (g) Mineral apposition rate (MAR) and mineralizing surface per bone surface (MS/BS) in vertebrae in ovariectomized mice treated with vehicle or LP533401 (100 mg per kg body weight per day, orally). #  $p < 0.05$  vs sham and \*  $p < 0.05$  vs OVX (Veh).

## Supplementary Fig. 4

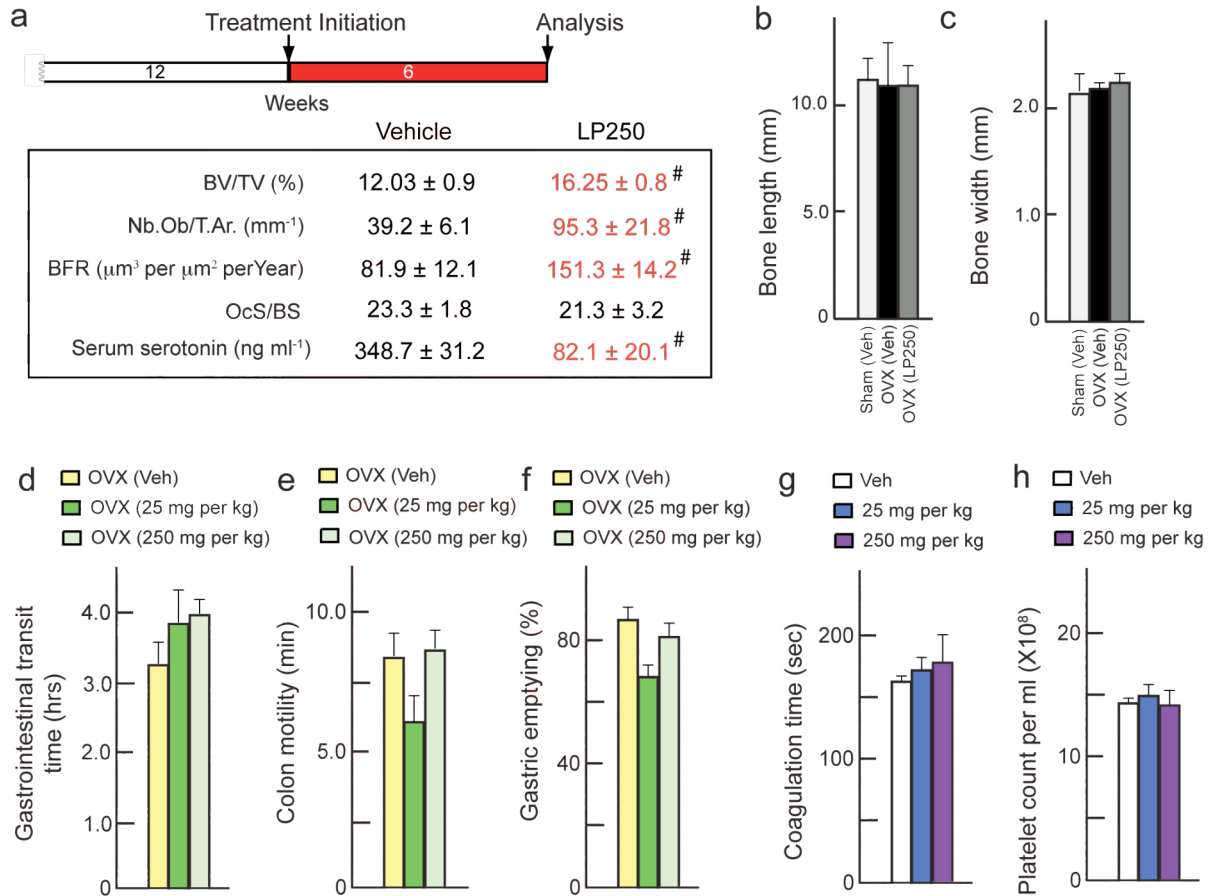

**Supplementary Fig. 4. Assessment of bone mass, length and width, humoral and gastrointestinal parameters in mice.** (a) Histomorphometric analysis of vertebrae and serum serotonin levels of 12 week–old wild–type mice treated for 6 weeks with vehicle or LP533401 (250 mg per kg body weight per day, orally). BV/TV, Bone volume over trabecular volume; Nb.Ob/T.Ar, osteoblast number over trabecular area; BFR, bone formation rate; OcS/BS, osteoclast surface over bone surface. (b–c) Bone length and width in sham, and OVX mice treated with vehicle or LP533401 (250 mg per kg body weight per day). (d–f) Changes in gastrointestinal transit time (d), colon motility (e) and gastric emptying (f) in ovariectomized mice that, 6–weeks after ovariectomy, were treated for 6–weeks with vehicle or LP533401 (25 or 250 mg per kg body weight per day, orally). (g–h) Changes in coagulation time (g) and platelet numbers (h) in wild–type mice that received either vehicle or LP533401 (25 or 250mg per kg body weight per day, orally) for 2 days.  $n=6-8$  for each group. #  $p < 0.05$  vs vehicle treated control.

## Supplementary Fig. 5

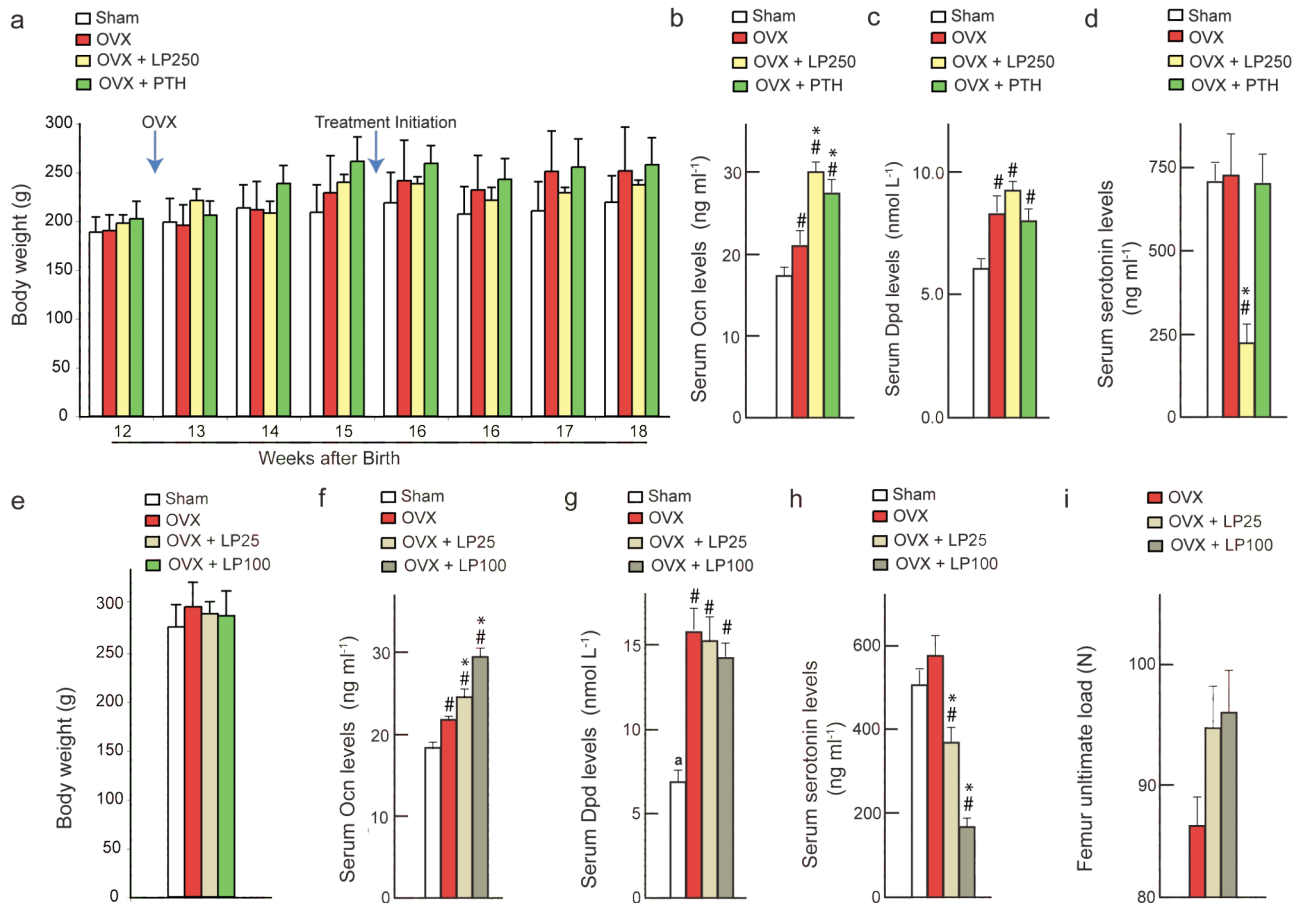

**Supplementary Fig. 5. Assessment of ovariectomy-induced and LP533401-induced changes in body weight, humoral and biomechanical parameters in sham or ovariectomized rats. (a–d)** Body weight changes (a), serum osteocalcin (b), serum Dpd (c), and serum serotonin levels (d) in wild-type sham-operated and ovariectomized rats that received either vehicle, LP533401 (250 mg per kg body weight per day, orally) or PTH (80 µg per kg body weight per day, subcutaneous) from week 3 to 7 post-ovariectomy. **(e–h)** body weight at sacrifice (e), serum osteocalcin (f), serum Dpd (g), serum serotonin levels (h) and femur ultimate load analysis (i) in wild-type sham-operated and ovariectomized rats that received either vehicle or LP533401 (25 or 100 mg per kg body weight per day, orally) from week 12 to 16 post-ovariectomy. *n*=5-10 for each group of rats. All values are expressed as means ± SEM. # *p* < 0.05 vs sham and \* *p* < 0.05 vs OVX (Veh).

## Supplementary Fig. 6

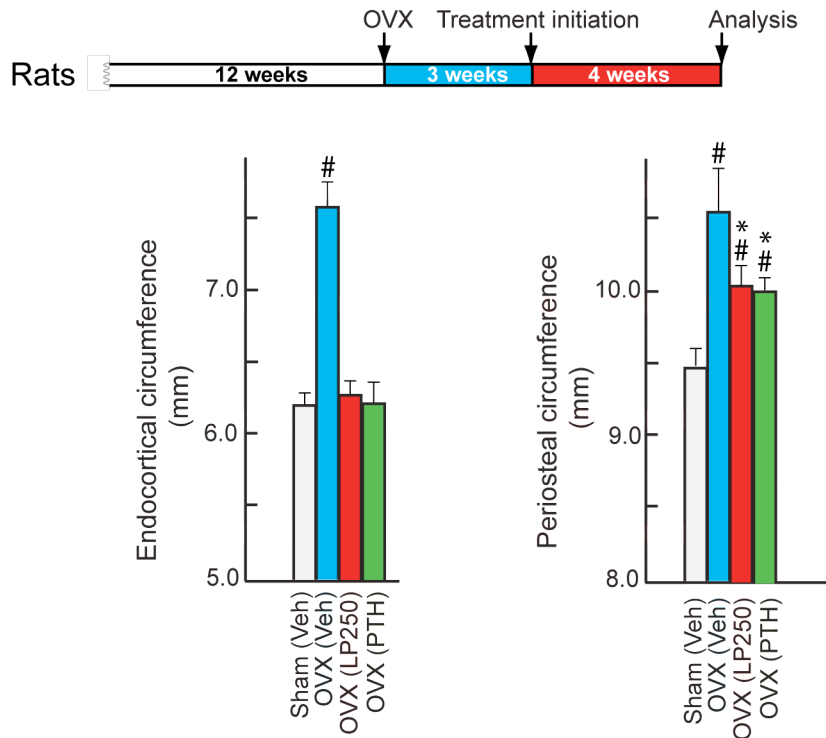

**Supplementary Fig. 6. Assessment of endocortical and periosteal parameters in sham and ovariectomized rats treated with vehicle, LP533401 and PTH.** Micro-computed tomography analysis of endocortical and periosteal circumference in wild-type sham-operated and ovariectomized rats that received either vehicle, LP533401 (250 mg per kg body weight per day, orally) or PTH (80  $\mu$ g per kg body weight per day, subcutaneous) from week 3 to 7 post-ovariectomy.  $n=5-7$  for each group of rats. All values are expressed as means  $\pm$  SEM. #  $p < 0.05$  vs sham and \*  $p < 0.05$  vs OVX (Veh).

## Supplementary Fig. 7

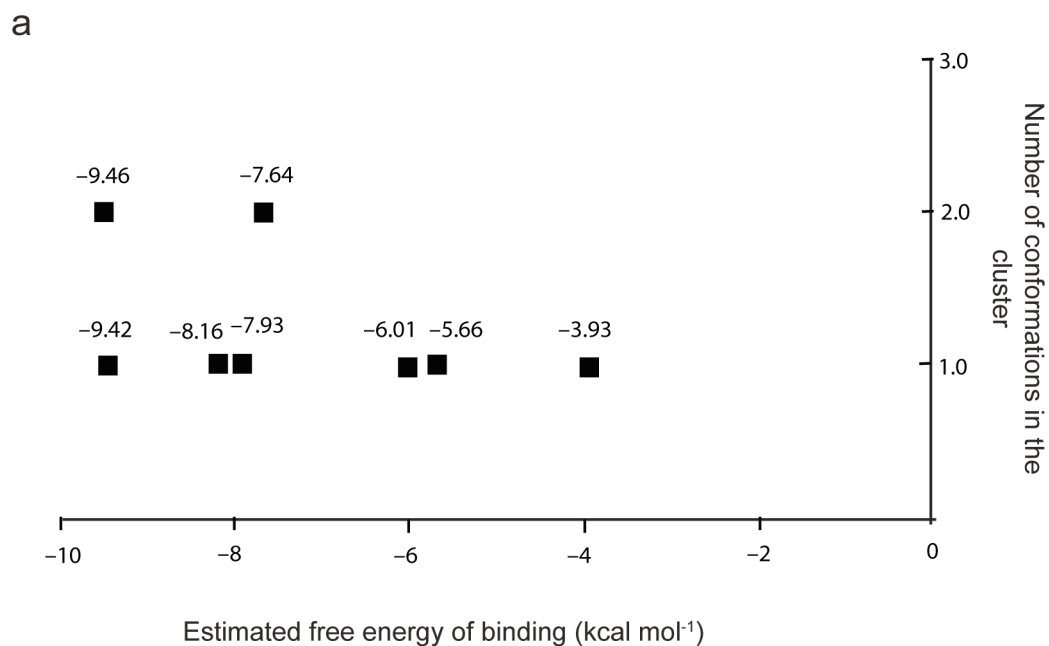

**b**

|                  |                                                  |
|------------------|--------------------------------------------------|
| Receptor Name    | Tph1 (1mlwA)                                     |
| Ligands' Names   | LP533401 and HBI                                 |
| Charge added     | 0.503 Å (tried on 0.403, 0.603, 0.703 and 0.753) |
| Method           | Blind Docking                                    |
| Algorithm        | Genetic Algorithm                                |
| Other Parameters | Default                                          |

### Supplementary Fig. 7. Bioinformatic analysis of Tph1 interaction with LP533401 and HBI.

(a) Plot of lowest estimated free energies of binding and no of conformations in that cluster for Tph1 and LP533401 docking. (b) Summary of files and parameters for docking studies using Autodock.
